# Supplementary material for: Promoter G-quadruplex folding precedes transcription and is controlled by chromatin
Source: PubMed Central journal article supplement (PMC8103603; doi:10.1186/s13059-021-02346-7), 2021-05-07
Supplement: 13059_2021_2346_MOESM2_ESM.pdf [file 13059_2021_2346_MOESM2_ESM.pdf]

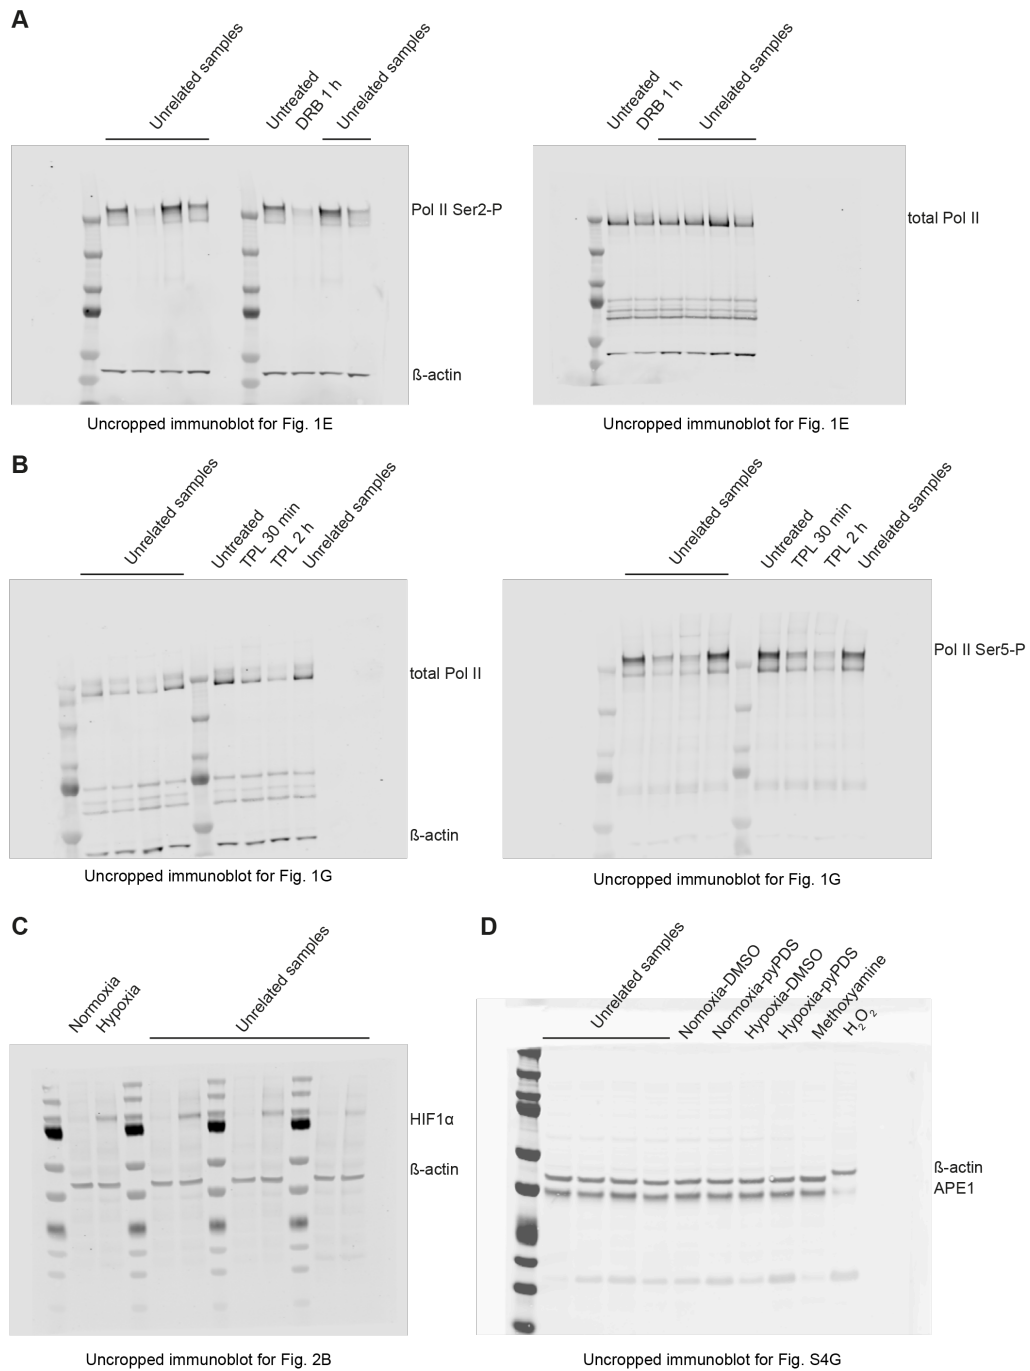

**Fig. S6: Uncropped Western blots for (A) Fig. 1E, (B) Fig.1G, (C) Fig. 2B and (D) Fig. S4G.**

Lanes labelled unrelated samples were not used as part of the main figures.
